# Supplementary material
Source: Royal Society of Chemistry journal article supplement (doi:10.1039/d6ja00099a)
Supplement: d6ja00099a1.xlsx [file d6ja00099a1.xlsx]

## Sheet: S1
S1 Recommended values of reference zircon materials used in this study
Reference Material	Recommended Age (Ma),	176Hf/177Hf	U (ppm)	Pb (ppm)	Source
91500	1065.4 ± 0.6 Ma	0.282308 ± 0.000006	80	15	91500: Wiedenbeck, M., Allé, P., Corfu, F., Griffin, W. L., Meier, M., Oberli, F., von Quadt, A., Roddick, J. C., & Spiegel, W. (1995). Three natural zircon standards for U-Th-Pb, Lu-Hf trace element and REE analyses. Geostandards Newsletter, 19, 1–23; Blichert-Toft J. The Hf isotopic composition of zircon reference material 91500. (2008).Chemical Geology, 253(3-4): 252-257.;
Plešovice	337.13 ± 0.37 Ma	0.282482 ± 0.000013	755	39	Plešovice: Sláma, J., Košler, J., Condon, D. J., Crowley, J. L., Gerdes, A., Hanchar, J. M., Horstwood, M. S. A., Morris, G. A., Nasdala, L., Norberg, N., Schaltegger, U., Schoene, B., Tubrett, M. N., & Whitehouse, M. J. (2008). Plešovice zircon - A new natural reference material for U–Pb and Hf isotopic microanalysis. Chemical Geology, 249(1–2), 1–35.
TANZ	566.16 ± 0.77 Ma		269	31	TANZ: Hu, Z., Li, X.-H., Luo, T., Zhang, W., Crowley, J., Li, Q., Ling, X., Yang, C., Li, Y., Feng, L., Xia, X., Zhang, S.-B., Wang, Z., Guo, J., Xu, L., Lin, J., Liu, X., Bao, Z., Liu, Y., Zong, K., Chen, W., Hu, S. (2021) Tanz zircon megacrysts: a new zircon reference material for the microbeam determination of U–Pb ages and Zr–O isotopes. Journal of Analytical Atomic Spectrometry, 36, 2715–273…
Penglai	4.4 ± 0.1 Ma	0.282906 ± 0.0000010	86.88	4.08	Penglai: Li, X. H., Long, W. G., Li, Q. L., Liu, Y., Zheng, Y. F., Yang, Y. H., ... & Tao, H. (2010). Penglai zircon megacrysts: a potential new working reference material for microbeam determination of Hf–O isotopes and U–Pb age. Geostandards and Geoanalytical Research, 34(2), 117-134.
Qinghu	159.5 ± 0.2 Ma	0.283002 ± 0.000004	1042		Qinghu: Li, X., Tang, G., Gong, B., Yang, Y., Hou, K., Hu, Z., ... & Li, W. (2013). Qinghu zircon: A working reference for microbeam analysis of U-Pb age and Hf and O isotopes. Chinese Science Bulletin, 58(36), 4647-4654.
MUN		0.282135 ± 0.000007			MUN: Fisher, C. M., Hanchar, J. M., Samson, S. D., Dhuime, B., Blichert-Toft, J., Vervoort, J. D., & Lam, R. (2011). Synthetic zircon doped with hafnium and rare earth elements: A reference material for in situ hafnium isotope analysis. Chemical Geology, 286(1-2), 32-47.

## Sheet: S2
S2 A comparison of the technique between previous studies and this study
	Xie et al., 2008	Yuan et al., 2008	Fisher et al., 2014	Craig et al., 2017	From et al., 2018	This Study
Laser	GeoLas CQ 193 nm	GeoLas 2005 193nm	New Wave 213nm	Analyte G2 193nm	RESOlution 193nm	RESOlution 193nm
ICP-MS	Agilent 7500a	Perkin Elmer Elan 6100DRC	Thermo Element 2	Thermo Element XR for U-Pb; iCAP RQ for REE	Thermo Element-XR 2	Thermo ICap Q
MC-ICP-MS	Neptune	Nu Plasma	Neptune	Neptune Plus	Neptune Plus	Neptune Plus
Spot size	60um for 91500	44um for 91500	40 um for 91500	50 um for Plesovice	33um for 91500	29 um for 91500
Frequnce	8 HZ	4-10 Hz	10 Hz	10 Hz	10 Hz	8-9Hz
Fluence	15 J/cm2	15-20 J/cm2	9-10 J/cm2	4 J/cm2	5 J/cm2	7-8 J/cm2
Gas Line	4:6 (Pb:Hf) of the ablation material via mass flow controllers	4:6 (Pb:Hf) of the ablation material via mass flow controllers	1:1 (Pb:Hf) of the gas line inner diameter	3:2:5 (Pb:REE:Hf)of the ablation material via mass flow controllers	Not given	4:6 (Pb:Hf) of the gas line inner diameter
Water vapour	No	No	No	No	No	Before chamber
RSE of U-Pb age	About 1.8%	About 1.8%	Not given	Not given	Not given	1.5-2.0 %
SE of 176Hf/177Hf	About 0.000025	About 0.000025	About 0.000025	About 0.000015 for Plesovice	Not given	0.000020-0.000030
Hf isotope Data reduction scheme	VBA offline	Offline	Iolite (normalized to Plesovice in Fisher et al., 2017)	Iolite 3.31	Iolite 3.32 (XBeta)	Iolite 4.10.5 (LCG)
References Fisher, C.M., Vervoort, J.D., DuFrane, S.A., 2014. Accurate Hf isotope determinations of complex zircons using the “laser ablation split stream” method. Geochemistry, Geophysics, Geosystems, 15 (1), 121–139. From, R.E., Camacho, A., Pearson, D.G., Luo, Y., 2018. U-Pb and Lu-Hf isotopes of the Archean orthogneiss complex on eastern Hall Peninsula, southern Baffin Island, Nunavut: Identi…

## Sheet: S3
S3 Recommended and Measure values of reference glass materials used in this study
BHVO-2G							BCR-2G
Element	Measured	Accepted	Diff	Variation	Minimum	Maximum	Measured	Accepted	Diff	Variation	Minimum	Maximum	Calibrant
	ppm	ppm	%	%RSD	ppm	ppm	ppm	ppm	%	%RSD	ppm	ppm
Ti	16504.5	16300	1.25	5.84	16074.2	17079.7	13307.4	14100	-5.62	6.48	12660.4	13791.3	G_NIST610
Y	26.2682	26	1.03	6.55	25.264	27.169	34.5448	35	-1.3	11.52	32.7406	37.2105	G_NIST610
Zr	170	170	0	0	170	170	184	184	0	0	184	184	G_NIST610
Nb	18.0381	18.3	-1.43	6.52	17.6052	18.9781	12.1881	12.5	-2.5	13.13	10.9083	12.9464	G_NIST610
La	15.3494	15.2	0.98	17.26	13.555	16.5765	24.6844	24.7	-0.06	11.06	22.9019	26.266	G_NIST610
Ce	38.5084	37.6	2.42	11.19	35.7926	40.7444	53.7343	53.3	0.81	8.38	51.4472	57.8303	G_NIST610
Pr	5.81773	5.35	8.74	10.45	5.35195	6.18609	6.73404	6.7	0.51	20.69	6.03897	7.97968	G_NIST610
Nd	25.5275	24.5	4.19	20.29	22.9952	29.2546	27.4911	28.9	-4.88	21.35	23.9417	31.4915	G_NIST610
Sm	6.5231	6.1	6.94	26.05	5.34215	7.60338	6.3414	6.59	-3.77	28.62	5.31431	7.99654	G_NIST610
Eu	2.41721	2.07	16.77	23.14	2.05542	2.72473	1.95345	1.97	-0.84	37.33	1.62277	2.61236	G_NIST610
Gd	6.27038	6.16	1.79	30.8	5.19862	7.42634	7.75294	6.71	15.54	23.8	6.3643	9.02541	G_NIST610
Tb	0.952745	0.92	3.56	28.67	0.749994	1.13407	1.00772	1.02	-1.2	25.4	0.884282	1.18853	G_NIST610
Dy	5.5676	5.28	5.45	38.19	3.75333	6.33583	6.46571	6.44	0.4	7.33	6.12112	6.74862	G_NIST610
Ho	1.03453	0.98	5.56	24.17	0.900134	1.19299	1.45033	1.27	14.2	17.8	1.27898	1.63341	G_NIST610
Er	2.67947	2.56	4.67	27.8	2.12152	3.08501	3.61251	3.7	-2.36	17.16	3.16477	4.05689	G_NIST610
Tm	0.394616	0.34	16.06	55.94	0.295676	0.577792	0.551403	0.51	8.12	24.98	0.486778	0.679725	G_NIST610
Yb	2.00547	2.01	-0.23	45.36	1.46908	2.46185	3.30225	3.39	-2.59	47.63	2.52908	4.51392	G_NIST610
Lu	0.269798	0.279	-3.3	54.12	0.148234	0.338145	0.519934	0.503	3.37	28.39	0.423481	0.634289	G_NIST610
Hf	4.86975	4.32	12.73	8.63	4.65409	5.14782	4.99961	4.84	3.3	23.6	3.92604	5.60635	G_NIST610
Ta	1.16484	1.15	1.29	25.18	0.965468	1.33155	0.707664	0.78	-9.27	16.42	0.617743	0.792442	G_NIST610
Pb	2.01487	1.7	18.5	29.3	1.66051	2.39104	12.5109	11	13.74	5.47	11.9335	12.8241	G_NIST610
Th	1.26935	1.22	4.05	26.76	1.08806	1.51775	5.88642	5.9	-0.23	9.74	5.42277	6.25054	G_NIST610
U	0.472537	0.403	17.25	22.62	0.41033	0.554805	1.75055	1.69	3.58	13.94	1.62207	1.91489	G_NIST610

## Sheet: S4
S4 LASS U-Pb dating results of the reference zircon materials
	206Pb/238U	2SE	206Pb/238U age (Ma)	2SE (Ma)	207Pb/235U	2SE	207Pb/235U (Ma)	2SE (Ma)	208Pb/232Th	2SE	208Pb/232Th (Ma)	2SE (Ma)	207Pb/206Pb	2SE	207Pb/206Pb (Ma)	2SE (Ma)	238U/206Pb	2SE	U/Th	2SE	U (ppm)	2SE (ppm)	Th(ppm)	2SE (ppm)	Pb (ppm)	2SE
Qinghu
QH - 1	0.0251785	0.00058104	160.293	3.65449	0.171597	0.0169942	159.956	14.6564	0.00749196	0.000403892	150.852	8.1015	0.0490407	0.0049751	72.6154	231.206	39.3359	0.936392	2.95549	0.0294276	1661.3	125.614	575.244	45.0179	40.4683	3.17605
QH - 2	0.0253328	0.00104791	161.246	6.57717	0.197731	0.0352662	179.942	29.6421	0.00842771	0.000853178	169.575	17.0949	0.0553474	0.010014	8.47409	556.765	39.1351	1.70965	1.69466	0.0541075	426.802	38.7332	251.878	28.4139	19.0342	1.99624
QH - 3	0.0248792	0.00104961	158.392	6.60527	0.187648	0.0343188	171.245	29.2382	0.00731075	0.000676496	147.193	13.5751	0.0551156	0.0110242	-332.361	668.291	39.9982	1.51101	1.55112	0.101934	486.055	66.8095	303.601	39.3919	21.0236	3.45176
QH - 4	0.0243082	0.00152509	154.769	9.58425	0.135715	0.0382622	124.725	33.6039	0.00770169	0.000725324	155.03	14.5403	0.04048	0.0112495	-242.078	703.986	41.9988	2.45801	1.33232	0.0610389	297.556	15.6664	224.987	6.76829	16.6816	1.50677
QH - 5	0.0254752	0.000867063	162.148	5.45164	0.187853	0.0361136	171.08	30.6517	0.00750171	0.000521577	151.039	10.4626	0.0552907	0.0113224	306.639	435.77	39.4337	1.39888	1.35679	0.0786822	601.171	46.1765	446.707	37.4271	30.5351	2.1821
QH - 6	0.0259365	0.00120801	165.031	7.59064	0.140871	0.032152	130.716	28.4807	0.00861269	0.000943627	173.268	18.9167	0.0406639	0.0100638	-487.819	547.481	38.7955	1.85072	2.32803	0.441873	432.278	112.315	157.518	11.2541	12.2297	1.44308
QH - 7	0.0247205	0.000872272	157.402	5.48482	0.176665	0.0326407	162.133	27.6875	0.00765083	0.000805402	154	16.1581	0.0517131	0.0100647	-144.678	551.051	39.9533	1.59658	1.90966	0.0682176	476.168	53.2706	246.669	23.3117	17.2388	2.02864
QH - 8	0.0246818	0.000860962	157.159	5.41218	0.183592	0.0266068	169.084	22.9168	0.00755889	0.000477572	152.189	9.57962	0.0539562	0.00767939	396.646	251.361	40.4369	1.34619	1.65673	0.0637064	623.913	113.068	403.043	83.1901	27.8349	5.45353
QH - 9	0.0248899	0.0011273	158.455	7.09427	0.201296	0.0455403	180.605	37.4296	0.00848953	0.000691266	170.83	13.8589	0.058035	0.0129675	44.5478	571.692	39.736	1.69921	1.60994	0.0607993	431.165	49.0745	282.93	41.149	22.3957	2.65458
QH - 10	0.025257	0.000597342	160.786	3.7567	0.170156	0.0214181	158.206	18.4548	0.00732482	0.000414149	147.498	8.3099	0.0491413	0.00626908	-99.3646	345.373	39.2962	0.954729	1.62604	0.0375447	1318.4	97.6286	817.461	47.6884	57.9972	4.21825
QH - 11	0.0250627	0.000822601	159.557	5.1737	0.19252	0.0304878	176.159	25.7021	0.00837383	0.000528868	168.527	10.5916	0.0559017	0.0090068	191.321	380.159	39.8682	1.35201	1.98721	0.0907578	1112.33	46.3302	550.8	15.7072	44.2355	3.40937
QH - 12	0.0251894	0.00134978	160.328	8.48766	0.146305	0.0309239	135.895	27.2398	0.00781116	0.000783469	157.222	15.7082	0.040823	0.00839449	-228.664	393.923	40.1904	2.30257	1.66782	0.0554345	437.199	35.6718	254.273	19.6655	18.8917	2.16834
QH - 13	0.0248846	0.000745107	158.44	4.68801	0.241789	0.0355123	225.186	33.4807	0.0106396	0.00111973	213.819	22.3834	0.0698909	0.0112614	803.418	350.081	40.009	1.25096	1.63194	0.0448906	726.225	77.3313	459.236	57.667	43.0948	3.2745
QH - 14	0.0253649	0.000906288	161.453	5.69919	0.146529	0.0253919	136.847	22.528	0.00715697	0.000570259	144.117	11.4428	0.0422226	0.007627	-193.724	342.362	39.5864	1.25214	1.69185	0.097616	859.743	161.897	555.316	126.245	36.3118	7.87567
QH - 15	0.0249102	0.000876567	158.595	5.51033	0.162175	0.0248454	150.736	21.8298	0.00781047	0.000798107	157.203	15.9842	0.047923	0.00777603	35.3339	355.111	40.4304	1.39645	2.49843	0.0596132	603.015	84.4743	239.618	36.8578	18.9365	2.54231
QH - 16	0.0249279	0.000591495	158.717	3.72004	0.15289	0.0202145	143.22	17.7297	0.00781311	0.000452765	157.29	9.07624	0.044203	0.0058781	-356.44	439.001	39.9238	0.952996	1.75565	0.0317516	998.134	57.6041	562.629	29.0405	42.4658	3.5234
QH - 17	0.0253095	0.00112042	161.094	7.0384	0.265233	0.06579	228.706	49.9131	0.010102	0.00150493	202.981	30.0498	0.0724699	0.0152638	728.224	448.121	39.8274	1.68329	1.31124	0.050028	485.243	72.4077	357.589	43.8669	31.3176	5.16353
QH - 18	0.0260562	0.000924063	165.797	5.80405	0.201626	0.0287159	184.215	24.018	0.00816567	0.000660619	164.342	13.2423	0.0569592	0.00886981	262.621	379.829	38.4859	1.36588	2.00619	0.0206038	743.596	58.5532	380.655	29.8141	27.6077	2.53763
QH - 19	0.0260247	0.000879158	165.601	5.52017	0.189662	0.0292482	173.923	24.691	0.00763075	0.000668704	153.614	13.3963	0.0539195	0.00850233	-92.6446	515.072	38.6896	1.2798	1.54406	0.0491577	558.073	83.419	372.481	59.6826	25.681	3.00131
QH - 20	0.0260365	0.000844046	165.677	5.30346	0.181005	0.0215737	167.586	18.3906	0.0079709	0.00053014	160.449	10.6269	0.0510866	0.00650769	6.13578	333.06	38.6511	1.28839	2.13998	0.0303422	960.377	98.3458	447.274	44.4209	33.3157	3.15691
QH - 21	0.0247993	0.00105203	157.889	6.61348	0.16962	0.0304651	156.401	25.9755	0.00709135	0.000483671	142.807	9.70705	0.0502843	0.00950467	-51.0185	505.39	40.7818	1.69659	1.48327	0.0495721	742.419	83.1078	516.099	66.9418	34.0122	4.26978
QH - 22	0.0242739	0.00108349	154.582	6.8252	0.147411	0.032146	136.514	27.9417	0.00780352	0.000646896	157.081	12.968	0.0429834	0.00872271	-301.921	486.283	41.2414	1.80522	2.00203	0.179853	592.645	84.6322	291.151	19.8186	21.4072	2.28148
QH - 23	0.0258319	0.00115095	164.376	7.21558	0.187712	0.0286016	172.335	24.3431	0.00766097	0.000718781	154.214	14.4169	0.0521727	0.00889933	-33.3659	434.613	38.4325	1.82991	1.81025	0.0798644	661.543	78.2774	378.678	62.6313	26.6454	4.63925
TANZ
TANZ - 1	0.0924918	0.00292916	570.072	17.2897	0.947891	0.120103	661.452	63.1396	0.0460097	0.00649567	906.085	125.402	0.0734928	0.00974706	904.918	263.802	10.7358	0.301895	6.64675	0.190718	193.078	15.8954	28.1739	2.2291	11.8799	1.74129
TANZ - 2	0.0932509	0.00259422	574.581	15.2705	0.767746	0.084267	581.025	53.9559	0.0344025	0.00526749	681.438	102.679	0.0623151	0.00731836	564.559	261.194	10.7083	0.289616	6.65206	0.236752	175.928	13.4651	27.1123	2.44787	8.89929	1.42173
TANZ - 3	0.0920569	0.0031124	567.482	18.3337	0.780729	0.103811	571.301	61.867	0.0346068	0.00427381	686.275	83.2156	0.0620857	0.00878994	585.691	300.338	10.8147	0.352093	6.59075	0.242736	191.809	15.389	28.5286	2.72313	8.86654	1.30168
TANZ - 4	0.0900855	0.00265015	555.89	15.6662	0.763622	0.0783419	568.17	44.8045	0.036201	0.00412773	717.49	80.4887	0.0616894	0.00643748	583.429	262.193	11.0469	0.327021	6.81388	0.163951	216.958	17.5073	32.6557	2.78597	11.5454	1.6491
TANZ - 5	0.0951249	0.00318978	585.598	18.7118	0.938338	0.147819	653.083	76.8823	0.0306072	0.00643359	606.827	125.367	0.0724862	0.0115584	707.342	425.198	10.4686	0.328379	6.66285	0.18196	236.721	16.956	36.0934	3.02886	10.6023	2.45601
TANZ - 6	0.0942586	0.00284295	580.5	16.7339	0.773849	0.104411	567.109	62.4224	0.0325124	0.00485975	644.896	95.2809	0.058156	0.00782568	465.037	290.898	10.5775	0.319122	6.62516	0.19699	212.057	16.7482	31.0837	2.53873	9.7095	1.63599
TANZ - 7	0.0890633	0.00232487	549.907	13.745	0.890861	0.130903	632.182	70.4998	0.0401614	0.00543977	794.211	105.915	0.0708674	0.0111029	730.977	355.336	11.25	0.290011	6.80144	0.3079	212.033	16.706	32.0807	3.47749	11.7653	1.74648
TANZ - 8	0.0947398	0.00321306	583.286	18.9128	1.04829	0.120983	713.664	60.7514	0.0470983	0.00808236	925.453	154.923	0.0779595	0.00868116	996.349	256.322	10.4418	0.408732	6.71018	0.194862	222.812	21.6718	33.025	3.11223	16.0222	3.32792
TANZ - 9	0.091044	0.00241247	561.582	14.2473	0.804481	0.110449	583.292	65.0226	0.0392644	0.00424134	777.096	82.2487	0.0635296	0.00855666	665.283	285.924	10.9427	0.289976	6.20636	0.180122	221.195	18.6931	36.0729	3.26121	12.2818	1.67125
Z_Plesovice
PLE - 1	0.0542059	0.00140171	340.244	8.5784	0.41004	0.0483492	343.685	35.6328	0.0179228	0.00197128	358.73	39.1366	0.054479	0.0065278	355.252	245.667	18.3215	0.49702	9.13604	0.182599	653.567	59.6621	73.3188	7.54445	11.8631	1.49471
PLE - 2	0.0535512	0.00144831	336.24	8.86442	0.41395	0.0491541	346.925	35.5177	0.0182386	0.00274999	364.751	54.5066	0.0551443	0.00659758	286.939	292.774	18.6908	0.516783	9.0783	0.255938	610.014	56.5747	66.3017	6.98913	11.4986	2.12617
PLE - 3	0.0527874	0.00235448	331.495	14.4223	0.392815	0.0505442	331.522	37.1887	0.0168734	0.00120118	338.101	23.8532	0.0547458	0.00632678	206.132	326.893	19.1251	0.896808	8.88023	0.218014	675.596	78.4844	74.8048	9.24847	11.1512	1.2551
PLE - 4	0.0525883	0.00148962	330.341	9.11898	0.396367	0.0470979	334.383	34.308	0.0183673	0.00255504	367.368	50.5926	0.0546964	0.00690922	260.244	288.055	18.9176	0.538479	9.81409	0.23301	671.568	61.5986	69.3515	6.62005	12.0506	2.01387
PLE - 5	0.0542784	0.00140569	340.688	8.59603	0.386849	0.0331202	329.679	24.2336	0.0152565	0.00178044	305.784	35.3609	0.0517447	0.0047858	153.922	221.369	18.2423	0.482784	6.39553	0.144115	1052.67	81.8686	170.637	15.1277	25.5467	3.11852
PLE - 6	0.0556633	0.00125518	349.163	7.66976	0.430105	0.0258214	362.009	18.348	0.0178924	0.00129354	358.326	25.6846	0.0557089	0.00331142	397.007	137.865	17.8646	0.419089	7.78557	0.135444	2247.45	203.032	282.742	29.0132	45.2395	3.83427
PLE - 7	0.053599	0.000932017	336.56	5.70356	0.414146	0.0246836	350.617	17.7473	0.0174842	0.000951867	350.27	18.8941	0.0533162	0.00330945	289.691	147.707	18.5238	0.326571	7.29562	0.152181	2332.56	252.139	330.283	40.7108	52.8621	6.5492
PLE - 8	0.0550468	0.00103514	345.405	6.32339	0.3962	0.0354027	336.166	25.3948	0.0193491	0.0014251	387.185	28.2378	0.0497375	0.00431188	169.305	214.363	18.045	0.339564	9.21752	0.192094	1397.17	107.292	151.145	12.7368	29.4659	2.82742
PLE - 9	0.0540765	0.00120073	339.469	7.3427	0.413183	0.0386759	348.231	28.4013	0.0176519	0.0018529	353.421	36.7965	0.0552471	0.00575614	361.589	225.502	18.3706	0.410422	8.97942	0.217205	842.176	74.4589	98.529	9.71443	14.6483	1.68055
PLE - 10	0.0548991	0.00175484	344.458	10.7143	0.407113	0.0392341	343.694	27.9471	0.0181875	0.00214353	363.95	42.4592	0.0535759	0.0055702	207.085	250.911	18.2988	0.573829	8.5499	0.234773	682.561	46.8309	80.2589	5.18852	13.5484	1.63863
Z_91500
91500 - 1	0.178077	0.00765328	1055.3	42.0478	1.77928	0.270626	994.257	104.847	0.0532608	0.00621107	1045.87	118.548	0.0707479	0.0112167	786.777	341.299	5.62734	0.266922	2.66025	0.0479686	83.5833	6.32505	32.3213	2.7135	16.1914	1.90889
91500 - 2	0.18056	0.00762924	1068.93	41.5913	1.95837	0.258826	1118.82	86.3195	0.0527745	0.00459331	1037.9	88.3164	0.0779988	0.00944043	1133.67	229.656	5.53937	0.235966	2.6794	0.0829302	73.9639	6.18459	28.2358	2.31401	14.1132	1.59203
91500 - 3	0.178295	0.00636798	1056.85	34.8243	2.07155	0.301504	1095.75	104.818	0.0553603	0.00434569	1087.62	83.3068	0.0834887	0.0114901	1220.97	251.804	5.61029	0.204478	2.70013	0.102531	79.6418	5.90912	29.5156	2.359	14.8022	1.25678
91500 - 4	0.180878	0.00693238	1070.86	37.6039	1.80003	0.240732	1011.54	94.024	0.054595	0.0062162	1107.32	137.487	0.0720736	0.0102652	795.824	343.622	5.54654	0.199946	2.64256	0.096616	84.5003	7.52363	31.2194	3.01027	15.8839	1.85967
91500 - 5	0.177728	0.00610806	1053.81	33.467	1.84382	0.219455	1036.17	77.0322	0.0524631	0.00660466	1030.14	126.565	0.0740176	0.0095476	859.08	259.882	5.60789	0.220532	2.66613	0.086435	82.6361	6.59608	30.433	2.38221	15.2108	2.26471
91500 - 6	0.181553	0.00628526	1074.68	34.279	1.51297	0.273277	884.397	112.063	0.0520313	0.00481255	1023.43	92.057	0.0598876	0.010764	288.952	402.85	5.51052	0.194085	2.67549	0.0992235	76.9676	6.11575	29.2857	2.15337	14.5429	1.43338
91500 - 7	0.176433	0.00612406	1046.71	33.5204	1.92244	0.219059	1063.41	79.3454	0.0566275	0.00636909	1110.24	121.184	0.081624	0.00958964	1131.77	238.802	5.69869	0.200279	2.66353	0.0871649	79.9676	6.04109	29.9414	2.58139	14.9609	1.5523
91500 - 8	0.18013	0.00710014	1066.72	38.7552	1.88938	0.211163	1054.43	75.8674	0.0565385	0.00507973	1109.72	96.6196	0.0771018	0.00860132	982.825	238.734	5.56717	0.223542	2.65597	0.115315	84.9239	6.55803	30.7991	2.48629	15.4489	1.49026
91500 - 9	0.180438	0.00612142	1068.66	33.403	1.91994	0.224872	1086.28	78.3504	0.0570511	0.00611781	1118.65	116.845	0.0751904	0.00920339	1079.01	224.703	5.52163	0.187012	2.67511	0.0589797	82.7507	8.41206	30.0363	3.06846	15.5476	2.22588
91500 - 10	0.178535	0.00630913	1058.18	34.4682	1.91632	0.244518	1079.74	75.6888	0.0507755	0.00447329	999.532	85.7049	0.0784781	0.0106753	1034.02	261.748	5.5986	0.198724	2.65692	0.0791709	75.8812	6.41292	29.2091	2.49816	14.0868	1.63348
91500 - 11	0.177844	0.00789396	1053.96	43.1152	1.85681	0.218949	1055.45	93.118	0.0545197	0.00455628	1071.37	87.2049	0.0785627	0.0110134	1019.47	275.965	5.64291	0.250485	2.65757	0.105182	79.9221	6.7347	30.9838	2.79587	15.8018	1.51686
91500 - 12	0.181865	0.00790433	1075.97	42.9289	1.8075	0.307141	999.686	109.147	0.0502059	0.00622279	987.21	119.286	0.0730145	0.0132426	706.346	391.97	5.49215	0.23259	2.65959	0.0929444	77.117	7.44318	29.6741	2.94479	14.325	1.80364
91500 - 13	0.177822	0.00694373	1054.14	38.1431	1.82387	0.265139	1013.8	102.356	0.0536923	0.00498383	1080.82	81.8978	0.0768413	0.0129726	850.74	382.707	5.63593	0.24129	2.6994	0.0730621	78.3862	5.91369	29.2684	2.34072	14.8085	1.3718
91500 - 14	0.179402	0.00693933	1062.76	37.7165	1.76418	0.282341	976.442	123.759	0.0556289	0.00506605	1092.24	97.0143	0.0713996	0.0114022	953.827	285.262	5.58761	0.208169	2.63467	0.0658078	82.7583	6.79631	30.9603	2.51922	15.583	1.64835
91500 - 15	0.177871	0.00701301	1054.36	38.353	2.08596	0.224185	1120.92	75.2168	0.0547327	0.00589682	1074.38	112.961	0.0848763	0.0100507	1152.43	248.601	5.64171	0.224405	2.70297	0.0943787	82.7643	6.70001	29.8579	2.57757	15.1176	1.84779
91500 - 16	0.179543	0.00572756	1063.84	31.1333	1.79264	0.249714	1004.21	99.3136	0.0496309	0.00541393	976.775	103.938	0.0694609	0.00961974	791.385	320.752	5.54937	0.169238	2.64239	0.0976773	79.6652	6.24682	30.6159	2.55852	14.5333	1.66428
91500 - 17	0.183437	0.00655721	1084.91	35.7012	1.6017	0.249548	933.673	95.4305	0.060145	0.00609062	1177.78	115.441	0.0609755	0.00959961	410.501	345.675	5.46494	0.19915	2.69107	0.0998141	75.4589	6.38803	28.6333	2.45947	15.0737	1.46941
91500 - 18	0.174582	0.0056775	1036.67	31.046	1.64279	0.183899	982.01	78.9563	0.0523279	0.00472183	1029.19	90.6962	0.0715522	0.00974545	721.72	329.069	5.76685	0.204663	2.65976	0.0779434	83.8877	6.34944	31.1136	2.54414	15.6309	1.63308
91500 - 19	0.182027	0.00759421	1076.94	41.4043	2.03827	0.329937	1083.03	104.441	0.0483295	0.00462322	952.354	89.1887	0.0829956	0.0141513	918.689	399.122	5.54894	0.236751	2.67981	0.0901212	79.2986	5.9437	29.9017	2.59394	14.4745	1.45081
91500 - 20	0.181391	0.0069443	1073.63	37.7089	1.81299	0.210589	1027.45	72.6814	0.0528299	0.00634006	1037.47	120.962	0.0720281	0.00945802	796.399	267.401	5.47262	0.223221	2.64303	0.0743554	79.6087	6.01916	29.7355	2.24368	15.0879	1.88591
91500 - 21	0.174866	0.00774673	1037.67	42.5617	1.89174	0.24257	1045.56	90.2049	0.0565204	0.00572743	1108.77	109.341	0.0772663	0.00887118	1019.42	243.922	5.70926	0.231072	2.72061	0.127635	84.8129	7.57003	31.5071	3.40117	15.455	1.95128
91500 - 22	0.183528	0.00773665	1085.09	41.9732	1.84292	0.262019	1024.31	96.2753	0.0579228	0.00776372	1133.64	147.667	0.0720429	0.00977671	820.263	313.928	5.46984	0.225262	2.70011	0.112654	77.4425	6.08046	29.2658	1.9269	14.7633	2.17291
91500 - 23	0.1771	0.00686219	1050.18	37.5921	1.83271	0.293265	1008.97	109.567	0.0531377	0.00642743	1043.29	122.698	0.0764543	0.0132054	788.86	417.583	5.64635	0.250784	2.66351	0.0900304	78.7255	5.86051	30.0068	2.22582	14.7306	1.69797
91500 - 24	0.179379	0.00752671	1062.5	41.1235	1.99413	0.301403	1070.16	104.972	0.0509289	0.00498997	1002.15	95.9335	0.0782104	0.0105594	1064.57	310.923	5.58133	0.20808	2.61362	0.0821785	82.2746	6.32304	31.5165	2.64659	15.294	1.80826
91500 - 25	0.178615	0.0072128	1058.41	39.4783	2.00527	0.275009	1084.99	87.7582	0.0548981	0.00549472	1077.97	105.064	0.0818587	0.0123356	997.44	317.135	5.66318	0.237754	2.7393	0.111353	81.7824	6.02596	29.9861	2.10442	15.5888	1.75305
91500 - 26	0.17973	0.00676896	1064.59	37.0032	1.83701	0.232387	1029.04	85.2049	0.0539642	0.00604645	1059.51	115.537	0.0744216	0.00947613	818.655	320.445	5.55295	0.181436	2.68136	0.0823844	75.975	6.34111	28.6485	2.7135	14.237	1.55405
91500 - 27	0.179541	0.00586865	1063.79	32.1302	1.97772	0.324619	1057.87	109.976	0.0560273	0.00717768	1097.88	137.36	0.0789483	0.012728	1016.77	397.178	5.54417	0.162091	2.64689	0.0967435	79.4378	6.72355	30.3895	2.82035	15.2312	1.82687
91500 - 28	0.180915	0.00774162	1070.79	42.1933	1.86309	0.284912	1023.87	104.1	0.0566646	0.00523221	1111.94	100.093	0.0745156	0.0118114	688.064	417.959	5.56181	0.243348	2.63122	0.0862717	82.5313	6.3036	31.3319	2.6859	15.9529	1.46506
91500 - 29	0.177727	0.00648111	1053.72	35.5156	1.82144	0.241641	1039.75	100.234	0.0528965	0.00586605	1039.16	112.875	0.0738168	0.00984308	923.854	316.734	5.63429	0.213937	2.71044	0.0987926	79.3685	5.97132	29.0859	2.47187	13.9339	1.66301
Z_91500 (43 μm)
91500 - 01	0.179666	0.00370218	1064.94	20.2658	1.93896	0.156779	1085.38	53.6497	0.0539227	0.0039842	1060.59	76.3879	0.0769925	0.00667603	1055.5	177.475	5.56629	0.11777	2.6598	0.0484093	78.8232	6.39774	29.9624	2.47215	15.2994	1.54476
91500 - 02	0.179863	0.00494414	1065.86	27.0349	1.8173	0.126929	1044.81	46.8303	0.0523016	0.00319162	1029.81	61.1942	0.0732219	0.00585242	964.2	163.465	5.57303	0.155828	2.67824	0.0650518	82.388	6.96029	30.2763	2.30257	14.8094	1.16106
91500 - 03	0.179398	0.0051087	1063.31	27.9014	1.76441	0.176246	1019.75	64.1836	0.0519138	0.00317071	1022.39	60.8377	0.0722178	0.00682204	917.773	192.09	5.58922	0.158576	2.64033	0.0623962	79.6066	5.32402	30.8494	2.32003	15.0451	1.31638
91500 - 04	0.181252	0.00531066	1073.39	28.8639	1.83823	0.164627	1048.18	58.7455	0.0512445	0.00351192	1009.37	67.4631	0.0738383	0.00731168	953.968	197.645	5.53523	0.155299	2.65365	0.0591664	78.7953	6.44148	29.5983	2.62831	14.1829	1.36608
91500 - 05	0.17885	0.00400289	1060.45	21.8709	1.93073	0.140698	1084.1	49.1773	0.0534044	0.00385817	1050.71	73.7836	0.0784576	0.00624758	1103.67	161.451	5.59858	0.12511	2.66391	0.055065	79.1713	6.34209	29.9621	2.60577	14.7853	1.24487
91500 - 06	0.177529	0.00470939	1053.13	25.6591	1.81231	0.130466	1042.89	46.7392	0.0526223	0.00364179	1035.79	69.9594	0.0741595	0.00553236	997.255	152.017	5.64722	0.14268	2.67441	0.048032	79.5155	6.95166	29.4976	2.43365	14.6483	1.45338
91500 - 07	0.176224	0.00330821	1046.15	18.1694	1.87219	0.149282	1062.7	53.0048	0.0530314	0.00344616	1043.75	65.9985	0.0765263	0.00590506	1054.53	169.317	5.64204	0.12972	2.65563	0.0562995	81.6887	6.18076	31.1645	2.44658	15.3895	1.27788
91500 - 08	0.178975	0.00357342	1061.19	19.5388	1.92617	0.103955	1086.05	37.1302	0.0530984	0.00369153	1044.94	70.9199	0.0783593	0.00478939	1123.73	126.704	5.59287	0.11228	2.67097	0.0414075	81.4557	5.88195	30.4301	2.22326	15.0867	1.29388
91500 - 09	0.180006	0.00533625	1066.58	29.0083	1.73578	0.139972	1012.83	53.9821	0.0544097	0.0036	1070.1	69.1866	0.0702918	0.00592089	865.939	191.062	5.57762	0.156257	2.66363	0.0490615	83.1679	6.36427	31.2564	2.49903	15.8176	1.37352
91500 - 10	0.18422	0.00570396	1089.5	30.9706	1.85525	0.129977	1058.53	45.967	0.0524689	0.00385401	1032.75	73.9118	0.0736724	0.00579092	978.477	160.968	5.45477	0.166922	2.66868	0.0409959	80.2289	9.73916	29.4898	3.05322	14.5299	1.92638
91500 - 11	0.178446	0.00491113	1058.13	26.7439	1.87057	0.139173	1063.52	48.0962	0.054127	0.00328031	1064.84	62.7995	0.0764195	0.0056566	1061.5	147.632	5.62304	0.147841	2.66124	0.0474742	78.011	5.90951	29.5969	2.28123	14.8159	1.12414
91500 - 12	0.180245	0.0041892	1068.06	22.8461	1.8302	0.119492	1050.56	43.6684	0.0552791	0.00341613	1086.86	65.4618	0.0739569	0.00468225	1003.84	136.025	5.5608	0.128385	2.67046	0.049135	77.7471	5.64877	28.8387	2.17796	14.7383	1.12434

## Sheet: S5
S5 LASS Hf isotope compositions of the reference zircon materials
Sammple	176Hf/177Hf	2SE	176Lu/177Hf	2SE	176Yb/177Hf	2SE	178Hf/177Hf	2SE	180Hf/177Hf	2SE
MUNZirc
MUNZ - 1	0.28217	4.2614e-05	0.0107912	8.86946e-06	0.426797	0.000646106	1.46725	0.000107002	1.88648	0.000207976
MUNZ - 2	0.282149	5.21474e-05	0.00221319	3.2841e-06	0.0696722	0.000231753	1.46713	8.28124e-05	1.88634	0.00018953
MUNZ - 3	0.28214	4.7251e-05	0.00222118	2.64798e-06	0.0693824	0.000147136	1.46733	8.89153e-05	1.88644	0.000207456
MUNZ - 4	0.28211	3.07284e-05	0.00426145	5.76872e-06	0.156906	0.000363846	1.46706	0.000107284	1.88638	0.00016763
MUNZ - 5	0.282164	3.29007e-05	0.00562097	1.63402e-05	0.200093	0.000495999	1.46715	8.03674e-05	1.88651	0.000169517
MUNZ - 6	0.282117	4.47816e-05	0.00658085	1.76504e-05	0.252581	0.00108821	1.46726	8.57235e-05	1.8866	0.000159593
MUNZ - 7	0.282166	3.35677e-05	0.00661752	7.16127e-06	0.243158	0.000387833	1.46724	6.03762e-05	1.88652	0.000129065
MUNZ - 8	0.282094	4.01361e-05	0.0111697	1.1821e-05	0.442643	0.000832491	1.46729	8.62669e-05	1.88685	0.000189981
MUNZ - 9	0.282161	4.5655e-05	0.00199072	4.39785e-06	0.062534	0.000173639	1.46738	8.29906e-05	1.88647	0.000178691
Z_Qinghu
QH - 1	0.282996	2.76904e-05	0.000826301	1.07899e-06	0.0294531	7.7595e-05	1.46722	8.13461e-05	1.88649	0.000155003
QH - 2	0.282996	3.75216e-05	0.000622668	4.56956e-06	0.0222634	0.000176928	1.4673	8.67662e-05	1.88658	0.000161789
QH - 4	0.282996	4.70345e-05	0.00120204	3.24354e-06	0.0440541	0.000173579	1.4673	6.04065e-05	1.88637	0.000128269
QH - 5	0.282996	3.48077e-05	0.0010711	2.41516e-05	0.0398285	0.00093821	1.4672	6.09118e-05	1.88642	0.000156185
QH - 6	0.282996	3.91777e-05	0.000660104	1.25715e-06	0.0236202	8.15442e-05	1.46729	6.42575e-05	1.88641	0.000135022
QH - 7	0.282996	5.32823e-05	0.000710958	3.05329e-06	0.0249869	0.000121373	1.46722	7.25754e-05	1.8863	0.00016169
QH - 8	0.282996	4.5271e-05	0.000708029	3.59058e-06	0.0251392	0.000131541	1.4673	8.34683e-05	1.88626	0.000235706
QH - 9	0.282996	5.16344e-05	0.000728612	4.54684e-06	0.0258424	0.000153348	1.46724	0.000116145	1.88666	0.0001746
QH - 10	0.282996	3.87177e-05	0.0010156	2.83552e-06	0.0369094	8.19409e-05	1.46726	9.95384e-05	1.8865	0.000229723
QH - 11	0.282996	4.26811e-05	0.00089798	4.15235e-06	0.0326384	0.000147887	1.46731	6.915e-05	1.88634	0.000156389
QH - 12	0.282997	4.58899e-05	0.000931387	3.47166e-06	0.0335861	0.000145076	1.46724	8.48193e-05	1.88646	0.000182326
QH - 13	0.282996	4.14981e-05	0.000721108	6.91046e-06	0.0257131	0.000267904	1.46714	8.06007e-05	1.88668	0.00022085
QH - 14	0.282997	4.16335e-05	0.000722705	1.81296e-05	0.0261548	0.000738604	1.4673	8.85632e-05	1.88644	0.000174642
QH - 15	0.282995	4.85167e-05	0.000526282	4.51849e-06	0.0185882	0.000144888	1.46721	9.67207e-05	1.88643	0.000191902
QH - 16	0.283002	3.44378e-05	0.000962584	3.51917e-06	0.0345395	0.000147298	1.46718	6.88238e-05	1.88628	0.000154879
QH - 18	0.282995	3.04729e-05	0.000778035	1.50379e-06	0.0280537	0.000102982	1.46736	6.80698e-05	1.8864	0.000144293
QH - 19	0.282998	3.2015e-05	0.00101676	2.46672e-05	0.0372324	0.000949073	1.46721	9.34889e-05	1.88638	0.000243772
QH - 20	0.282994	3.09178e-05	0.000735308	2.80937e-06	0.0261996	0.000131721	1.46731	6.81566e-05	1.8864	0.000123239
QH - 21	0.283007	4.7035e-05	0.000992509	8.00456e-06	0.0361202	0.000292247	1.46731	8.24615e-05	1.8867	0.000223781
QH - 22	0.282992	3.37362e-05	0.000540038	2.16026e-05	0.0193803	0.000788428	1.46737	6.1783e-05	1.88641	0.000126717
QH - 23	0.282996	3.35815e-05	0.000974796	4.33022e-05	0.0350686	0.00169402	1.46736	5.90684e-05	1.88656	0.000151713
Z_91500
91500 - 1	0.282271	4.15567e-05	0.000558945	1.33964e-06	0.0193351	3.83455e-05	1.46733	7.61087e-05	1.88655	0.000175151
91500 - 2	0.282245	4.43548e-05	0.00045886	8.99478e-07	0.0157747	3.64045e-05	1.4674	8.13722e-05	1.88657	0.000153173
91500 - 3	0.282231	4.08233e-05	0.000544283	2.02028e-06	0.0189962	5.12594e-05	1.46728	7.37183e-05	1.88657	0.000178898
91500 - 4	0.282259	4.48199e-05	0.000612301	1.43675e-06	0.0213845	4.92352e-05	1.4673	7.78331e-05	1.88637	0.000157995
91500 - 5	0.282279	6.15359e-05	0.000609448	1.33279e-06	0.0214395	6.5113e-05	1.4674	8.14e-05	1.88657	0.000153
91500 - 6	0.282256	5.24346e-05	0.000553283	1.24763e-06	0.0194124	4.7402e-05	1.46738	9.10868e-05	1.8866	0.000176347
91500 - 7	0.282268	4.64704e-05	0.000563978	9.42627e-07	0.0196923	4.08564e-05	1.46737	8.29166e-05	1.88649	0.00019034
91500 - 8	0.282292	4.23062e-05	0.000571116	9.27442e-07	0.0201167	3.84174e-05	1.46731	7.08744e-05	1.88663	0.000171433
91500 - 9	0.282308	4.22074e-05	0.00053137	1.34292e-06	0.0183957	9.13971e-05	1.4673	7.43621e-05	1.88655	0.000170552
91500 - 10	0.282264	4.22263e-05	0.000464194	9.28138e-07	0.0158728	3.09074e-05	1.46733	8.18474e-05	1.88664	0.000179775
91500 - 11	0.282324	4.94114e-05	0.00046248	9.76839e-07	0.0159006	3.17254e-05	1.46739	7.91358e-05	1.88623	0.000180071
91500 - 12	0.28227	4.72909e-05	0.000403304	1.20738e-06	0.0139339	5.96111e-05	1.46738	8.80585e-05	1.88644	0.000200318
91500 - 13	0.282253	4.36335e-05	0.00042449	2.23091e-06	0.0146929	7.1651e-05	1.4673	7.82493e-05	1.88659	0.000196288
91500 - 14	0.282279	4.75914e-05	0.000460485	7.87504e-07	0.0160261	3.44595e-05	1.46737	7.4876e-05	1.88653	0.000167372
91500 - 15	0.282241	4.08743e-05	0.000459429	1.07871e-06	0.0160632	3.38615e-05	1.46738	8.16658e-05	1.88648	0.000150014
91500 - 16	0.282251	3.90521e-05	0.000459331	8.09119e-07	0.0160987	3.35528e-05	1.46733	7.28884e-05	1.88686	0.000180943
91500 - 17	0.282266	3.97176e-05	0.000425806	8.54735e-07	0.0149482	3.75122e-05	1.4673	8.08279e-05	1.8866	0.000183138
91500 - 18	0.282277	4.48426e-05	0.000460573	7.83108e-07	0.0163831	3.52379e-05	1.46742	7.12936e-05	1.88653	0.000154279
91500 - 19	0.282329	5.35848e-05	0.000455109	8.41705e-07	0.016015	3.61334e-05	1.46723	8.1617e-05	1.88639	0.000215342
91500 - 20	0.282277	4.16722e-05	0.00046083	1.05744e-06	0.0162737	3.96636e-05	1.46733	8.12914e-05	1.88648	0.000177205
91500 - 21	0.28231	4.02108e-05	0.000409451	3.73612e-06	0.0146263	0.000154809	1.46732	7.34434e-05	1.88644	0.000167261
91500 - 22	0.282308	4.23542e-05	0.000324197	1.81324e-06	0.0112466	6.99732e-05	1.46729	7.68711e-05	1.88647	0.000171745
91500 - 23	0.282248	4.47755e-05	0.000422282	4.4879e-06	0.0146869	0.000150272	1.46736	8.64502e-05	1.8864	0.000189969
91500 - 24	0.282298	4.37048e-05	0.000460564	8.75197e-07	0.0161699	3.52578e-05	1.46729	9.03808e-05	1.88631	0.000183878
91500 - 25	0.282265	4.48299e-05	0.000420328	2.17725e-06	0.0149414	8.96121e-05	1.46732	7.18049e-05	1.88662	0.000158327
91500 - 26	0.282275	4.49212e-05	0.000428203	1.14712e-06	0.0146728	4.43328e-05	1.46722	7.36417e-05	1.88645	0.000144976
91500 - 27	0.282271	4.71953e-05	0.000458995	8.09988e-07	0.0159206	4.19214e-05	1.46737	8.66915e-05	1.88637	0.000176482
91500 - 28	0.282296	4.20927e-05	0.000461048	7.60681e-07	0.0163834	5.02178e-05	1.46732	7.93543e-05	1.88671	0.000154614
91500 - 29	0.282279	5.19051e-05	0.000442126	1.5186e-06	0.0154899	4.82334e-05	1.46738	8.86e-05	1.88654	0.000193
Z_Plesovice
PLE - 1	0.282485	3.24441e-05	0.000145415	6.12586e-07	0.00728387	3.31944e-05	1.46732	8.26792e-05	1.88671	0.000161151
PLE - 2	0.282471	3.67595e-05	0.000145885	4.30161e-07	0.00735731	3.0076e-05	1.46731	7.23858e-05	1.88648	0.00019133
PLE - 3	0.282499	3.33996e-05	0.00026634	1.84557e-06	0.0129832	6.36401e-05	1.46724	5.98113e-05	1.88647	0.000129941
PLE - 4	0.282487	2.66435e-05	0.000198777	5.23338e-07	0.00968874	4.17797e-05	1.46724	5.98113e-05	1.88647	0.000129941
PLE - 5	0.282512	3.16438e-05	0.000301645	1.2412e-06	0.015002	5.50351e-05	1.46735	9.06e-05	1.8864	0.000161
PLE - 6	0.28251	4.77939e-05	0.000277355	7.67614e-07	0.0141912	3.52094e-05	1.46738	0.000106	1.88602	0.000208
PLE - 7	0.282469	3.09945e-05	0.000191751	5.52292e-07	0.0101039	2.28814e-05	1.46723	8.31117e-05	1.88643	0.000190978
PLE - 8	0.282514	3.53881e-05	0.000224807	6.12124e-07	0.0111827	2.9585e-05	1.46732	7.46944e-05	1.88641	0.00015741
PLE - 9	0.282474	3.08988e-05	0.000146451	4.33742e-07	0.00710534	1.97662e-05	1.46718	8.17323e-05	1.88625	0.000183187
PLE - 10	0.282514	3.66944e-05	0.00016432	1.73372e-06	0.00809168	7.88209e-05	1.46725	6.5916e-05	1.88638	0.000154206
Z_Penglai
Penglai-1	0.282932	5.81848e-05	0.000208783	9.50361e-07	0.00795616	3.28151e-05	1.46746	0.000130361	1.8868	0.000287202
Penglai-2	0.282898	4.10274e-05	0.000165996	2.89118e-06	0.00627046	9.72402e-05	1.46735	8.8931e-05	1.88658	0.000168103
Penglai-3	0.282927	4.34286e-05	0.000207004	1.31762e-06	0.00782174	6.67958e-05	1.46736	8.311e-05	1.88643	0.000172781
Penglai-4	0.282882	4.90777e-05	0.000195857	1.34112e-06	0.00743424	4.76923e-05	1.4672	8.29256e-05	1.88649	0.000203981
Penglai-5	0.282905	3.83051e-05	0.000206252	2.13465e-06	0.00796623	8.15983e-05	1.46726	7.95518e-05	1.8866	0.000158646
Penglai-6	0.282907	3.7099e-05	0.000201701	7.64571e-07	0.00779626	1.92044e-05	1.46724	8.48125e-05	1.88641	0.000157485
Z_91500 (43 μm)
91500 - 01	0.282261	2.53814e-05	0.0004457	4.56729e-07	0.0147731	2.38839e-05	1.46732	5.02023e-05	1.88669	0.000101211
91500 - 02	0.282298	2.46594e-05	0.000446761	5.5757e-07	0.0151115	3.05928e-05	1.46729	4.69463e-05	1.88664	0.00013687
91500 - 03	0.282286	2.47763e-05	0.00044688	5.10674e-07	0.0151619	2.29906e-05	1.46739	5.60621e-05	1.88664	0.00012776
91500 - 04	0.282299	2.25951e-05	0.000447171	5.09003e-07	0.0151808	3.21183e-05	1.46726	4.66795e-05	1.88656	0.000103812
91500 - 05	0.282275	2.54963e-05	0.000447825	5.20439e-07	0.0151792	3.0147e-05	1.46727	5.45032e-05	1.88656	0.000115342
91500 - 06	0.282287	2.29844e-05	0.000438415	4.99086e-07	0.0148572	3.97851e-05	1.4672	5.22844e-05	1.8866	0.000118995
91500 - 07	0.282287	2.89902e-05	0.000437336	4.68689e-07	0.0147688	3.78952e-05	1.46733	5.67649e-05	1.88685	0.000120524
91500 - 08	0.282303	2.20768e-05	0.000437616	4.8581e-07	0.0148006	2.33372e-05	1.46726	4.91529e-05	1.8866	0.000115952
91500 - 09	0.282267	2.40668e-05	0.000438867	4.86122e-07	0.0149167	2.52952e-05	1.46725	4.86042e-05	1.88655	0.000111329
91500 - 10	0.282275	2.48659e-05	0.000436984	4.78679e-07	0.0149967	3.6797e-05	1.46728	5.05299e-05	1.88663	0.000111622
91500 - 11	0.282261	2.43068e-05	0.000439447	4.84836e-07	0.0150355	3.30668e-05	1.4673	4.62418e-05	1.88664	0.000109788
91500 - 12	0.282266	2.299e-05	0.000438784	4.28736e-07	0.0150171	2.13589e-05	1.46725	5.94212e-05	1.88667	0.000129894
